# Supplementary material
Source: publisher site journal article supplement (https://www.dovepress.com/get_supplementary_file.php?f=270305.docx)
Supplement: Supplementary file 1 [file get_supplementary_file.php]

**Supplemental Table. Time points of COVID-19 patients with ‘re-positive’**

| **Groups by age range** | **Overall (N=23)** | **age≤45 (N=9)** | **age>45 (N=14)** | **p** |
| --- | --- | --- | --- | --- |
| SEX (%) |  |  |  | 0.1228 |
| F | 12 (52.2) | 7 (77.8) | 5 (35.7) |  |
| M | 11 (47.8) | 2 (22.2) | 9 (64.3) |  |
| **Time points (days)** | | | | |
| Onset of symptoms to hospital admission (median [IQR]) | 2.00 [1.00, 6.00] | 4.50 [0.00, 6.25] | 2.00 [1.00, 6.00] | 0.9175 |
| Length of hospital stay (median [IQR]) | 22.00 [16.00, 29.50] | 23.00 [18.00, 30.00] | 18.50 [16.00, 28.50] | 0.5281 |
| Onset of symptoms to negative conversion (median [IQR]) | 19.00 [14.25, 26.00] | 18.50 [14.75, 27.50] | 20.50 [14.00, 26.00] | 0.8911 |
| last negative to hospital discharge (median [IQR]) | 1.00 [1.00, 2.00] | 1.00 [1.00, 2.00] | 1.00 [1.00, 1.00] | 0.1853 |
| last negative to positive again (median [IQR]) | 9.00 [8.00, 15.00] | 15.00 [9.00, 16.00] | 9.00 [8.00, 12.00] | 0.0807 |
| Hospital discharge to positive again (median [IQR]) | 7.00 [7.00, 13.00] | 7.00 [7.00, 14.00] | 7.00 [7.00, 8.00] | 0.3225 |
| Antivirus treatment duration (median [IQR]) | 12.00 [9.00, 17.00] | 12.00 [9.00, 17.00] | 13.50 [9.25, 16.75] | 0.7758 |
| Onset of symptoms to onset of antivirus (median [IQR]) | 2.00 [2.00, 6.00] | 4.50 [1.00, 6.25] | 2.00 [2.00, 6.00] | 0.9722 |
| Onset of symptoms to end of antivirus (median [IQR]) | 16.00 [11.25, 22.75] | 16.00 [10.75, 21.00] | 15.50 [12.50, 22.75] | 0.7583 |

**Supplemental Table. Time points of COVID-19 patients with ‘re-positive’.**

Groups comparison were using Chi-square test or Fisher's exact test for categorical variables and Kruskal-Wallis rank sum test for quantitative variables. P-values of less than 0.05 was regarded as significant. P-values presented in this table have not been adjusted for multiplicity. No imputation was made for missing data. All statistical analyses were performed with R software (version 3.6.3; [www.r-project.org](http://www.r-project.org)).
